# Supplementary material
Source: Springer Nature journal article supplement (https://www.springermedizin.de/resource/supplementary/12913_2013_3561_MOESM10_ESM.pdf/9533226)

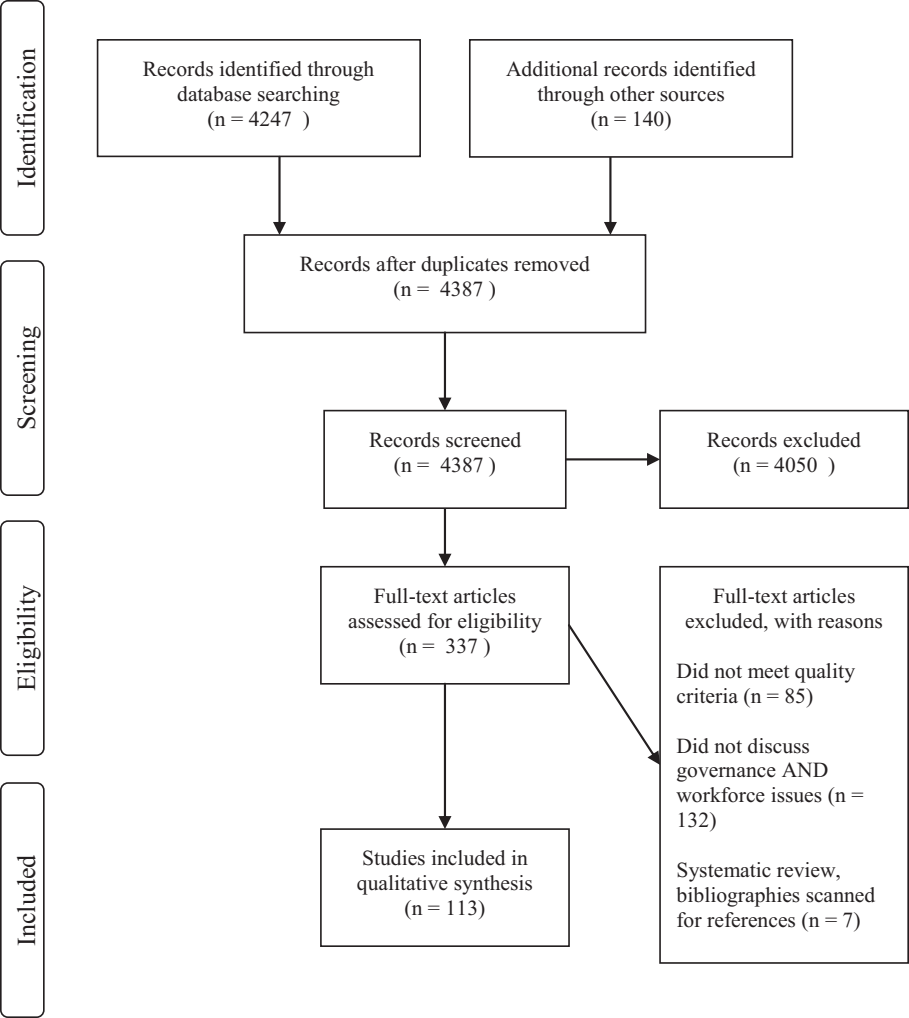

Supplement: MOESM10 [file 9533226]
